# Supplementary material
Source: HighWire-hosted journal article supplement (https://www.canjsurg.ca/highwire/filestream/96691/field_highwire_adjunct_files/0/cjs-003019-1-at.pdf)
Supplement: cjs-003019-1-at.pdf [file cjs-003019-1-at.pdf]

Appendix 1 to Hawel J, McFadgen H, Stewart R, et al. Interventional radiology-assisted transgastric endoscopic drainage of peripancreatic fluid collections. *Can J Surg* 2020.

DOI: 10.1503/cjs.003019

Copyright © 2020 The Author(s) or their employer(s).

To receive this resource in an accessible format, please contact us at [cmajgroup@cmaj.ca](mailto:cmajgroup@cmaj.ca).

*Online appendices are unedited and posted as supplied by the authors.*

### Appendix 1. PFC Characteristics.

|                               | Mean (SD)            | Median (min, max) |
|-------------------------------|----------------------|-------------------|
| <b>Size (cm)</b>              | 12.70 (3.31)         | 13.0 (5, 18.3)    |
|                               | <b>Frequency (%)</b> |                   |
| <b>Classification</b>         |                      |                   |
| Pseudocyst                    | 20 (51.3)            |                   |
| WON                           | 19 (48.7)            |                   |
| Infected                      | 20 (51.3)            |                   |
| Not infected                  | 19 (48.7)            |                   |
| <b>Etiology</b>               |                      |                   |
| Acute pancreatitis            | 32 (82.0)            |                   |
| Chronic pancreatitis          | 1 (2.6)              |                   |
| Acute-on-chronic pancreatitis | 1 (2.6)              |                   |
| Post-op                       | 4 (10.2)             |                   |
| Post-op pancreatitis          | 1 (2.6)              |                   |
| <b>Location</b>               |                      |                   |
| Head                          | 3 (7.6)              |                   |
| Body                          | 14 (35.9)            |                   |
| Tail                          | 4 (10.3)             |                   |
| Combination                   | 14 (35.9)            |                   |
| Head & body                   | 2 (14.3)             |                   |
| Body & tail                   | 10 (71.4)            |                   |
| Head & Tail                   | 1 (7.1)              |                   |
| Head, Body, Tail              | 1 (7.1)              |                   |
| Not specified                 | 4 (10.3)             |                   |
| <b>Symptoms</b>               |                      |                   |
| Pain                          | 30 (76.9)            |                   |
| Isolated pain                 | 20 (66.7)            |                   |
| Pain and GOO                  | 3 (10.0)             |                   |
| Pain and sepsis               | 1 (3.3)              |                   |
| Pain and “other”              | 6 (20.0)             |                   |
| GOO                           | 8 (20.5)             |                   |
| Asymptomatic                  | 1 (2.6)              |                   |

Appendix 1 to Hawel J, McFadgen H, Stewart R, et al. Interventional radiology-assisted transgastric endoscopic drainage of peripancreatic fluid collections. *Can J Surg* 2020.

DOI: 10.1503/cjs.003019

*Online appendices are unedited and posted as supplied by the authors.*

**Appendix 2. Summary of Complications (n=7)**

| <b>Classification</b> | <b>Infected vs Sterile</b> | <b>Clavien-Dindo Classification</b> | <b>Details</b>                                                                                                                                         |
|-----------------------|----------------------------|-------------------------------------|--------------------------------------------------------------------------------------------------------------------------------------------------------|
| Pseudocyst            | Sterile                    | Grade IIIb                          | POD 1: Free air in the abdomen requiring exploratory laparoscopy, no findings at laparoscopy.                                                          |
| Pseudocyst            | Infected                   | Grade IIIb                          | POD 14: Readmitted for EGD to remove and replace migrated stent. PFC persistent, now infected.                                                         |
| Pseudocyst            | Sterile                    | Grade IIIb                          | POD 8: Admitted to ICU with sepsis, bacteremia secondary to dislodged stent and persistent PFC. Repeat endoscopy for removal and replacement of stent. |
| WON                   | Sterile                    | Grade IVb                           | POD 12: Admitted to ICU for resuscitation from massive UGIB from gastrotomy and eroded splenic artery.                                                 |
| Pseudocyst            | Sterile                    | Grade IIIb                          | POD 11: admitted to ICU w/ sepsis and AKI secondary to blocked stent and persistent, now infected pseudocyst.                                          |
| Pseudocyst            | Sterile                    | Grade IIIa                          | Intra-op from IR portion: pneumothorax, chest tube placed in right pleural space                                                                       |
| Pseudocyst            | Infected                   | Grade V                             | POD 49: Admit w/ GIB, no clear source.<br>POD 56: Transferred ICU w/ sepsis secondary to massive retroperitoneal abscess. POD57: died.                 |

*POD: postoperative day, EGD: esophagogastroduodenoscopy, ICU: intensive care unit, UGIB: upper gastrointestinal bleed, AKI: acute kidney injury, GIB: gastrointestinal bleed*
